# Supplementary material for: Zircon U–Pb Dating of Tuff Layers in the Middle–Upper Triassic Strata of Successions and Sedimentation of Chang 7 Member in the Ordos Basin, China
Source: Frontiers journal article supplement (doi:10.3389/feart.2022.908940), 2022-08-26
Supplement: Table_1.XLSX [file Table_1.XLSX]

## Sheet: MTG-1
Table S1. LA-ICP-MS zircon U-Pb data for the metamorphic rocks in this study.
Spot No.	Elemental data			Isotopic Ratios						Age (Ma)
	Th	U	Th/U	207Pb/206Pb	1σ	207Pb/235U	1σ	206Pb/238U	1σ	207Pb/206Pb	1σ	207Pb/235U	1σ	206Pb/238U	1σ	Concordance
	(ppm)	(ppm)
91	235.289	329.215	0.714699	0.0510982	0.00164856	0.264811	0.00831538	0.0376422	0.000470804	255.62	74.0625	238.537	6.67751	238.201	2.92773	0.99
78	301.679	416.668	0.724028	0.053268	0.00148104	0.278452	0.00825837	0.0377127	0.000304716	338.945	95.36	249.428	6.56123	238.639	1.89732	0.95
63	166.163	254.961	0.651722	0.0532523	0.00144232	0.277059	0.00746922	0.0377824	0.0003746	338.945	61.105	248.322	5.94114	239.072	2.33049	0.96
65	235.157	306.653	0.766851	0.0509851	0.00125232	0.265482	0.00655423	0.0377842	0.000332033	238.955	52.7675	239.075	5.26142	239.084	2.06653	0.99
86	356.424	356.899	0.998669	0.0524297	0.00104726	0.274475	0.00552168	0.0379426	0.000347216	305.615	46.2925	246.265	4.40235	240.068	2.16037	0.97
87	350.241	419.145	0.835609	0.0528807	0.00113163	0.277391	0.00577482	0.0380931	0.000360332	324.13	48.1425	248.585	4.59345	241.002	2.24139	0.96
67	250.325	320.888	0.780101	0.0518718	0.00129539	0.27242	0.00689806	0.0381063	0.000367921	279.69	62.03	244.627	5.50712	241.084	2.28841	0.98
88	286.55	304.752	0.940272	0.0531911	0.00137988	0.279655	0.0072455	0.0381267	0.00039379	344.5	59.2525	250.384	5.75169	241.211	2.44877	0.96
62	58.2959	94.7141	0.615493	0.0521883	0.00222585	0.270525	0.0106026	0.0382495	0.000521177	294.505	96.2825	243.114	8.47506	241.974	3.23859	0.99
83	466.869	390.375	1.19595	0.0555975	0.00131131	0.293511	0.00695024	0.0383026	0.000380194	435.23	51.8475	261.32	5.45871	242.303	2.3641	0.92
71	265.108	259.474	1.02171	0.0554025	0.0013765	0.293103	0.00752758	0.03833	0.000372998	427.825	55.55	260.999	5.91354	242.473	2.31943	0.92
77	363.757	449.525	0.809202	0.0538283	0.00153647	0.285972	0.00867309	0.0383919	0.000433724	364.87	64.8075	255.384	6.85033	242.857	2.69578	0.94
80	139.561	196.173	0.711421	0.0507987	0.00137854	0.269969	0.00722846	0.0385081	0.000377097	231.55	65.73	242.669	5.78175	243.579	2.34448	0.99
79	283.619	302.855	0.936483	0.0498137	0.00106206	0.265296	0.00595411	0.0385121	0.000393136	187.12	17.5875	238.925	4.78086	243.603	2.44388	0.98
82	308.114	361.71	0.851826	0.0566287	0.00125784	0.30207	0.00690171	0.0385285	0.000289568	475.97	48.1425	268.016	5.38519	243.706	1.80224	0.9
84	202.171	214.77	0.941339	0.0518897	0.00151136	0.276116	0.00813228	0.0385339	0.000358276	279.69	66.6575	247.572	6.4729	243.739	2.22779	0.98
81	297.901	360.746	0.825791	0.055374	0.00125878	0.294562	0.00653184	0.0385651	0.000321021	427.825	49.995	262.144	5.12632	243.933	1.99694	0.92
20	193.311	215.69	0.896244	0.0576171	0.00162614	0.29919	0.00787272	0.0378763	0.000386885	516.705	61.105	265.767	6.15558	239.656	2.40648	0.89
75	144.262	216.787	0.665452	0.0571269	0.00186546	0.306094	0.0106972	0.0385852	0.000413755	498.19	67.585	271.149	8.31823	244.058	2.57152	0.89
51	193.787	174.088	1.11316	0.0580537	0.00187721	0.306563	0.0100334	0.0383267	0.000388591	531.52	74.9875	271.514	7.79955	242.453	2.41611	0.88
57	147.181	169.597	0.86783	0.0571303	0.00356875	0.299411	0.0221484	0.0376389	0.000569983	498.19	137.018	265.94	17.3081	238.181	3.5434	0.88
58	270.203	501.546	0.53874	0.0583981	0.001207	0.311214	0.0060147	0.0387117	0.000297959	546.33	46.29	275.122	4.66144	244.843	1.8539	0.88
70	188.693	258.578	0.729735	0.0576795	0.00185664	0.303543	0.0105458	0.0379603	0.000439728	516.705	65.7325	269.164	8.21662	240.178	2.73408	0.88
21	164.593	235.74	0.698197	0.0588337	0.0015925	0.305524	0.00780093	0.0377399	0.000349798	561.145	59.25	270.706	6.07003	238.808	2.17676	0.87
66	466.669	604.416	0.772099	0.0591274	0.00146006	0.30555	0.00663967	0.0377177	0.000310039	572.255	58.3225	270.726	5.16724	238.671	1.9303	0.87

## Sheet: PlotDat8
Source sheet	MTG-1 (2)	0.264811	0.0376422	0.148159	0.022	0.159197	0.0235416	0.14	0.0383	0.277409	0.0382845	0.290963	0.0381283	0.288375	0.0382934	0.275411	0.0382372	0.28284	0.0384164	0.286139	0.0385847	0.282871	0.0386082	0.290632	0.0386639	0.286588	0.0389605	0.304041	0.0388213	0.304508	0.0388388	0.299112	0.0389836	0.28092	0.0390225	0.274316	0.0390486	0.312526	0.0389235	0.288436	0.0390225	0.304457	0.039003
Plot name	Concordia6	0.278452	0.0377127	0.153307	0.0227206	0.17067	0.0251306	0.36	0.0381242	0.277164	0.0383326	0.290721	0.0381595	0.288155	0.0383317	0.275218	0.0382711	0.282677	0.0384519	0.285969	0.0386216	0.282668	0.0386458	0.290419	0.0387042	0.286277	0.0390138	0.303836	0.0388602	0.304286	0.038877	0.298857	0.0390279	0.280708	0.0390611	0.27414	0.0390887	0.312324	0.0389531	0.288198	0.0390592	0.304265	0.0390359
Plot Type	1	0.277059	0.0377824	0.159197	0.0235416	0.182256	0.026722			0.276444	0.0383543	0.290008	0.0381736	0.287509	0.0383489	0.274651	0.0382864	0.282198	0.0384678	0.285468	0.0386381	0.282071	0.0386627	0.289792	0.0387223	0.28536	0.0390378	0.303235	0.0388776	0.303635	0.0388941	0.298107	0.0390479	0.280082	0.0390784	0.273623	0.0391067	0.311728	0.0389665	0.287495	0.0390757	0.3037	0.0390506
1st free col	45	0.265482	0.0377842	0.165117	0.0243632	0.193957	0.028316			0.275277	0.0383485	0.288851	0.0381699	0.286461	0.0383444	0.273732	0.0382824	0.281423	0.0384635	0.284657	0.0386337	0.281103	0.0386583	0.288775	0.0387175	0.283873	0.0390315	0.30226	0.038873	0.30258	0.0388896	0.296891	0.0390426	0.279068	0.0390738	0.272787	0.0391019	0.31076	0.038963	0.286355	0.0390714	0.302784	0.0390467
Sigma Level	1	0.274475	0.0379426	0.171067	0.0251854	0.205774	0.0299124			0.273708	0.0383156	0.287294	0.0381487	0.285052	0.0383183	0.272496	0.0382592	0.280381	0.0384392	0.283567	0.0386085	0.279802	0.0386326	0.287408	0.03869	0.281873	0.0389951	0.300948	0.0388465	0.30116	0.0388636	0.295255	0.0390124	0.277705	0.0390475	0.271663	0.0390744	0.309459	0.0389428	0.284821	0.0390464	0.301552	0.0390243
Absolute Errs	TRUE	0.277391	0.0380931	0.177048	0.0260083	0.217708	0.0315113			0.271797	0.0382568	0.285397	0.0381107	0.283336	0.0382715	0.27099	0.0382178	0.279112	0.0383959	0.28224	0.0385635	0.278216	0.0385867	0.285743	0.0386409	0.279437	0.0389301	0.299351	0.038799	0.29943	0.0388171	0.293262	0.0389583	0.276044	0.0390005	0.270294	0.0390252	0.307873	0.0389067	0.282953	0.0390018	0.300052	0.0389843
Symbol Type	1	0.27242	0.0381063	0.183059	0.0268319	0.229759	0.0331127			0.269617	0.0381745	0.283233	0.0380574	0.281379	0.038206	0.269272	0.0381597	0.277664	0.0383351	0.280726	0.0385004	0.276409	0.0385223	0.283844	0.038572	0.276658	0.0388389	0.29753	0.0387325	0.297457	0.0387518	0.290989	0.0388824	0.274149	0.0389345	0.268733	0.0389564	0.306065	0.0388561	0.280822	0.0389391	0.29834	0.0389281
Inverse Plot	FALSE	0.279655	0.0381267	0.189101	0.0276561	0.24193	0.0347165			0.267253	0.0380716	0.280886	0.0379909	0.279256	0.0381242	0.267409	0.0380872	0.276094	0.0382592	0.279084	0.0384216	0.274448	0.0384419	0.281784	0.0384859	0.273644	0.0387251	0.295554	0.0386494	0.295317	0.0386703	0.288523	0.0387877	0.272094	0.0388521	0.26704	0.0388705	0.304103	0.0387929	0.27851	0.0388609	0.296483	0.038858
Color Plot	TRUE	0.270525	0.0382495	0.195174	0.028481	0.254222	0.0363229			0.264795	0.0379523	0.278445	0.0379137	0.277048	0.0380292	0.265472	0.038003	0.274462	0.0381712	0.277377	0.0383303	0.272409	0.0383487	0.279643	0.0383861	0.27051	0.038593	0.293499	0.0385531	0.293092	0.0385758	0.28596	0.0386777	0.269958	0.0387565	0.26528	0.0387708	0.302063	0.0387195	0.276107	0.0387701	0.294552	0.0387767
3D plot	FALSE	0.293511	0.0383026	0.201278	0.0293066	0.266635	0.0379317			0.262338	0.037821	0.276004	0.0378287	0.27484	0.0379248	0.263535	0.0379105	0.27283	0.0380743	0.275671	0.0382298	0.27037	0.0382461	0.277501	0.0382763	0.267377	0.0384477	0.291445	0.0384471	0.290868	0.0384718	0.283396	0.0385568	0.267821	0.0386514	0.263521	0.0386611	0.300023	0.0386388	0.273703	0.0386702	0.292622	0.0386872
Linear	FALSE	0.293103	0.03833	0.207413	0.0301328	0.279171	0.0395431			0.259976	0.0376828	0.273658	0.0377393	0.272718	0.0378149	0.261672	0.037813	0.271262	0.0379724	0.27403	0.0381241	0.26841	0.0381381	0.275443	0.0381608	0.264364	0.0382948	0.289471	0.0383355	0.288729	0.0383624	0.280932	0.0384296	0.265768	0.0385408	0.261829	0.0385458	0.298062	0.0385538	0.271393	0.0385651	0.290766	0.038593
Data Range	G5:J21	0.285972	0.0383919	0.213579	0.0309597	0.291832	0.0411569			0.257799	0.0375431	0.271495	0.0376489	0.270763	0.0377037	0.259957	0.0377145	0.269817	0.0378694	0.272519	0.0380171	0.266605	0.038029	0.273546	0.0380439	0.261589	0.0381402	0.287651	0.0382227	0.286758	0.0382517	0.278662	0.0383009	0.263876	0.0384289	0.260271	0.0384291	0.296255	0.0384679	0.269263	0.0384588	0.289056	0.0384977
Filled Symbols	TRUE	0.269969	0.0385081	0.219777	0.0317872	0.304617	0.0427732			0.255892	0.0374072	0.2696	0.037561	0.26905	0.0375956	0.258453	0.0376187	0.268551	0.0377692	0.271195	0.0379131	0.265022	0.0379228	0.271885	0.0379303	0.259157	0.0379897	0.286057	0.0381129	0.285032	0.038144	0.276672	0.0381756	0.262217	0.03832	0.258906	0.0383157	0.294672	0.0383843	0.267398	0.0383553	0.287558	0.038405
ConcAge	FALSE	0.265296	0.0385121	0.226006	0.0326154	0.317529	0.0443921			0.254328	0.0372804	0.268045	0.0374788	0.267644	0.0374946	0.25722	0.0375292	0.267512	0.0376756	0.270109	0.037816	0.263724	0.0378236	0.270521	0.0378241	0.257161	0.0378492	0.28475	0.0380105	0.283615	0.0380435	0.27504	0.0380588	0.260857	0.0382184	0.257787	0.0382097	0.293373	0.0383062	0.265867	0.0382588	0.286328	0.0383185
ConcSwap	FALSE	0.30207	0.0385285	0.232268	0.0334443	0.330569	0.0460135			0.253166	0.0371674	0.26689	0.0374057	0.2666	0.0374047	0.256304	0.0374495	0.266741	0.0375923	0.269303	0.0377296	0.262761	0.0377353	0.269509	0.0377296	0.25568	0.0377242	0.283779	0.0379192	0.282563	0.037954	0.273828	0.0379547	0.259847	0.0381279	0.256956	0.0381154	0.292408	0.0382367	0.26473	0.0381728	0.285416	0.0382415
1st Symbol-row	1	0.276116	0.0385339	0.238561	0.0342738	0.343738	0.0476374			0.252452	0.0370727	0.266179	0.0373443	0.265958	0.0373293	0.255741	0.0373827	0.266268	0.0375225	0.268807	0.0376571	0.262168	0.0376613	0.268887	0.0376504	0.254768	0.0376193	0.283182	0.0378427	0.281916	0.0378789	0.273083	0.0378674	0.259226	0.038052	0.256446	0.0380364	0.291814	0.0381784	0.264031	0.0381006	0.284854	0.0381769
		0.294562	0.0385651	0.244886	0.035104	IsoLine	IsoLine			0.252213	0.0369998	0.26594	0.0372971	0.265743	0.0372714	0.255552	0.0373313	0.26611	0.0374688	0.268642	0.0376014	0.26197	0.0376043	0.268678	0.0375895	0.254463	0.0375386	0.282982	0.0377839	0.281699	0.0378212	0.272833	0.0378002	0.259018	0.0379936	0.256275	0.0379756	0.291614	0.0381336	0.263796	0.0380452	0.284666	0.0381272
		IsoLine	IsoLine	0.251244	0.0359349					0.252459	0.0369517	0.266182	0.0372659	0.265963	0.037233	0.255745	0.0372973	0.266273	0.0374333	0.268812	0.0375646	0.262173	0.0375667	0.268892	0.0375492	0.254774	0.0374852	0.283187	0.037745	0.28192	0.037783	0.273088	0.0377558	0.259231	0.037955	0.256452	0.0379354	0.291817	0.0381039	0.264034	0.0380085	0.284858	0.0380943
				0.257634	0.0367664					0.253178	0.0369301	0.266895	0.0372518	0.266609	0.0372158	0.256312	0.037282	0.266751	0.0374174	0.269313	0.0375481	0.26277	0.0375498	0.269519	0.0375311	0.255691	0.0374613	0.283788	0.0377275	0.282572	0.0377658	0.273838	0.0377359	0.259856	0.0379377	0.256968	0.0379174	0.292413	0.0380906	0.264737	0.037992	0.285423	0.0380795
				0.264057	0.0375986					0.254345	0.0369358	0.268053	0.0372555	0.267656	0.0372203	0.257231	0.037286	0.267527	0.0374217	0.270124	0.0375525	0.263737	0.0375543	0.270535	0.0375359	0.257178	0.0374676	0.284763	0.0377322	0.283627	0.0377703	0.275054	0.0377411	0.26087	0.0379423	0.257804	0.0379223	0.293381	0.038094	0.265877	0.0379963	0.286339	0.0380834
				0.270513	0.0384315					0.255914	0.0369687	0.269609	0.0372767	0.269065	0.0372465	0.258467	0.0373092	0.268569	0.037446	0.271214	0.0375777	0.265039	0.0375799	0.271902	0.0375634	0.259178	0.0375039	0.286075	0.0377587	0.285047	0.0377964	0.27669	0.0377714	0.262234	0.0379686	0.258928	0.0379498	0.294682	0.0381142	0.267411	0.0380213	0.287571	0.0381058
				0.277001	0.0392651					0.257825	0.0370275	0.271506	0.0373147	0.270781	0.0372932	0.259973	0.0373506	0.269838	0.0374893	0.272541	0.0376227	0.266624	0.0376259	0.273567	0.0376125	0.261614	0.0375689	0.287672	0.0378062	0.286777	0.0378429	0.278683	0.0378255	0.263895	0.0380157	0.260297	0.0379989	0.296267	0.0381503	0.269279	0.0380659	0.289072	0.0381459
				0.283523	0.0400993					0.260005	0.0371099	0.27367	0.0373679	0.272739	0.0373587	0.261691	0.0374087	0.271286	0.0375501	0.274055	0.0376858	0.268432	0.0376902	0.275466	0.0376814	0.264393	0.0376601	0.289493	0.0378727	0.288749	0.0379081	0.280956	0.0379014	0.265789	0.0380816	0.261858	0.0380678	0.298076	0.038201	0.27141	0.0381286	0.290783	0.038202
				0.290078	0.0409342					0.262369	0.0372127	0.276017	0.0374345	0.274862	0.0374405	0.263554	0.0374812	0.272856	0.037626	0.275697	0.0377645	0.270393	0.0377706	0.277526	0.0377674	0.267407	0.0377739	0.291469	0.0379558	0.290889	0.0379896	0.283422	0.0379961	0.267844	0.038164	0.263551	0.0381537	0.300038	0.0382642	0.273722	0.0382068	0.29264	0.0382721
				0.296666	0.0417697					0.264827	0.0373321	0.278458	0.0375117	0.27707	0.0375355	0.265492	0.0375654	0.274488	0.037714	0.277404	0.0378559	0.272432	0.0378639	0.279668	0.0378673	0.270541	0.037906	0.293524	0.0380521	0.293114	0.0380842	0.285985	0.0381061	0.269981	0.0382596	0.265311	0.0382534	0.302078	0.0383376	0.276125	0.0382976	0.294571	0.0383535
				0.303289	0.0426059					0.267284	0.0374633	0.280899	0.0375966	0.279277	0.0376399	0.267429	0.037658	0.27612	0.0378109	0.27911	0.0379563	0.27447	0.0379664	0.281809	0.0379771	0.273674	0.0380513	0.295578	0.0381581	0.295339	0.0381881	0.288549	0.038227	0.272117	0.0383647	0.26707	0.038363	0.304117	0.0384183	0.278529	0.0383975	0.296501	0.038443
				0.309944	0.0434428					0.269647	0.0376015	0.283246	0.037686	0.2814	0.0377498	0.269291	0.0377554	0.277688	0.0379127	0.280751	0.0380621	0.27643	0.0380744	0.283868	0.0380926	0.276687	0.0382042	0.297552	0.0382697	0.297478	0.0382976	0.291013	0.0383542	0.274171	0.0384754	0.268762	0.0384784	0.306078	0.0385033	0.280839	0.0385026	0.298357	0.0385372
				0.316634	0.0442804					0.271823	0.0377412	0.285408	0.0377764	0.283355	0.037861	0.271006	0.0378539	0.279133	0.0380158	0.282262	0.038169	0.278236	0.0381836	0.285764	0.0382095	0.279462	0.0383589	0.299372	0.0383825	0.299448	0.0384083	0.293283	0.0384829	0.276063	0.0385873	0.27032	0.038595	0.307885	0.0385892	0.282969	0.0386089	0.300067	0.0386325
				0.323359	0.0451186					0.27373	0.0378771	0.287303	0.0378644	0.285068	0.0379691	0.27251	0.0379498	0.280399	0.038116	0.283586	0.038273	0.279818	0.0382898	0.287426	0.0383231	0.281894	0.0385094	0.300966	0.0384923	0.301175	0.0385159	0.295273	0.0386081	0.277721	0.0386961	0.271685	0.0387085	0.309469	0.0386728	0.284834	0.0387124	0.301565	0.0387251
				0.330117	0.0459575					0.275294	0.0380039	0.288858	0.0379466	0.286474	0.0380701	0.273743	0.0380393	0.281438	0.0382095	0.284672	0.0383701	0.281116	0.0383889	0.288789	0.0384293	0.28389	0.0386498	0.302273	0.0385947	0.302592	0.0386165	0.296905	0.038725	0.279081	0.0387978	0.272804	0.0388144	0.310768	0.0387508	0.286365	0.0388089	0.302795	0.0388116
				0.33691	0.0467971					0.276456	0.0381169	0.290013	0.0380197	0.287518	0.03816	0.274659	0.0381189	0.282208	0.0382928	0.285478	0.0384565	0.28208	0.0384772	0.289801	0.0385237	0.285371	0.0387749	0.303244	0.0386859	0.303644	0.038706	0.298117	0.0388291	0.280091	0.0388882	0.273635	0.0389087	0.311733	0.0388203	0.287502	0.0388949	0.303708	0.0388887
				0.343738	0.0476374					0.27717	0.0382116	0.290724	0.0380811	0.288159	0.0382354	0.275222	0.0381858	0.282682	0.0383627	0.285974	0.038529	0.282672	0.0385513	0.290424	0.038603	0.286283	0.0388798	0.303841	0.0387624	0.304291	0.0387811	0.298862	0.0389164	0.280712	0.0389641	0.274146	0.0389878	0.312327	0.0388786	0.288201	0.0389671	0.304269	0.0389533
				0.346697	0.048					0.277409	0.0382845	0.290963	0.0381283	0.288375	0.0382934	0.275411	0.0382372	0.28284	0.0384164	0.286139	0.0385847	0.282871	0.0386082	0.290632	0.0386639	0.286588	0.0389605	0.304041	0.0388213	0.304508	0.0388388	0.299112	0.0389836	0.28092	0.0390225	0.274316	0.0390486	0.312526	0.0389235	0.288436	0.0390225	0.304457	0.039003
				IsoLine	IsoLine					ErrEll	ErrEll	ErrEll	ErrEll	ErrEll	ErrEll	ErrEll	ErrEll	ErrEll	ErrEll	ErrEll	ErrEll	ErrEll	ErrEll	ErrEll	ErrEll	ErrEll	ErrEll	ErrEll	ErrEll	ErrEll	ErrEll	ErrEll	ErrEll	ErrEll	ErrEll	ErrEll	ErrEll	ErrEll	ErrEll	ErrEll	ErrEll	ErrEll	ErrEll

## Sheet: PlotDat9
Source sheet	MTG-1 (2)	0.2	241.591	1	238.201	2.92773	0.85	235.274
Plot name	Average7	17.8	241.591	2	238.639	1.89732	1.15	235.274
Plot Type	15			3	239.072	2.33049	1.15	241.129
1st free col	8			4	239.084	2.06653	0.85	241.129
Sigma Level	1			5	240.068	2.16037	0.85	235.274
Absolute Errs	TRUE			6	241.002	2.24139	ErrBox	ErrBox
Symbol Type	1			7	241.084	2.28841	1.85	236.742
Inverse Plot	FALSE			8	241.211	2.44877	2.15	236.742
Color Plot	TRUE			9	241.974	3.23859	2.15	240.537
3D plot	FALSE			10	242.303	2.3641	1.85	240.537
Linear	FALSE			11	242.473	2.31943	1.85	236.742
Data Range	O5:P21			12	242.857	2.69578	ErrBox	ErrBox
Filled Symbols	TRUE			13	243.579	2.34448	2.85	236.742
ConcAge	FALSE			14	243.603	2.44388	3.15	236.742
ConcSwap	FALSE			15	243.706	1.80224	3.15	241.403
1st Symbol-row	1			16	243.739	2.22779	2.85	241.403
				17	243.933	1.99694	2.85	236.742
				IsoLine	IsoLine	IsoLine	ErrBox	ErrBox
							3.85	237.017
							4.15	237.017
							4.15	241.15
							3.85	241.15
							3.85	237.017
							ErrBox	ErrBox
							4.85	237.907
							5.15	237.907
							5.15	242.228
							4.85	242.228
							4.85	237.907
							ErrBox	ErrBox
							5.85	238.761
							6.15	238.761
							6.15	243.243
							5.85	243.243
							5.85	238.761
							ErrBox	ErrBox
							6.85	238.796
							7.15	238.796
							7.15	243.372
							6.85	243.372
							6.85	238.796
							ErrBox	ErrBox
							7.85	238.762
							8.15	238.762
							8.15	243.66
							7.85	243.66
							7.85	238.762
							ErrBox	ErrBox
							8.85	238.735
							9.15	238.735
							9.15	245.212
							8.85	245.212
							8.85	238.735
							ErrBox	ErrBox
							9.85	239.939
							10.15	239.939
							10.15	244.667
							9.85	244.667
							9.85	239.939
							ErrBox	ErrBox
							10.85	240.154
							11.15	240.154
							11.15	244.792
							10.85	244.792
							10.85	240.154
							ErrBox	ErrBox
							11.85	240.162
							12.15	240.162
							12.15	245.553
							11.85	245.553
							11.85	240.162
							ErrBox	ErrBox
							12.85	241.234
							13.15	241.234
							13.15	245.923
							12.85	245.923
							12.85	241.234
							ErrBox	ErrBox
							13.85	241.16
							14.15	241.16
							14.15	246.047
							13.85	246.047
							13.85	241.16
							ErrBox	ErrBox
							14.85	241.903
							15.15	241.903
							15.15	245.508
							14.85	245.508
							14.85	241.903
							ErrBox	ErrBox
							15.85	241.511
							16.15	241.511
							16.15	245.966
							15.85	245.966
							15.85	241.511
							ErrBox	ErrBox
							16.85	241.936
							17.15	241.936
							17.15	245.929
							16.85	245.929
							16.85	241.936
							ErrBox	ErrBox

## Sheet: PlotDat1
Source sheet	An-2 (2)	0.288761	0.0375756	0.148159	0.022	0.159197	0.0235416	0.14	0.0401867	0.302394	0.0380127	0.312651	0.0381819	0.298276	0.0382957	0.286687	0.0382872	0.312195	0.0384689	0.293278	0.0384583	0.30572	0.0385563	0.305703	0.0384551	0.301398	0.0384183	0.30642	0.0385101	0.293175	0.0385008	0.29778	0.0385278	0.30442	0.0385199	0.304307	0.0387011	0.28638	0.03865	0.302891	0.0388177	0.284906	0.0388065	0.2823	0.038893	0.283507	0.0386917
Plot name	Concordia1	0.296414	0.0376912	0.153307	0.0227206	0.17067	0.0251306	0.36	0.0367932	0.302131	0.0380456	0.312338	0.0382188	0.298016	0.0383383	0.286428	0.0383233	0.311902	0.0385117	0.292998	0.0384981	0.305459	0.0386011	0.3054	0.0384916	0.301161	0.0384503	0.306114	0.0385487	0.292898	0.0385372	0.297547	0.0385648	0.304113	0.0385562	0.304042	0.0387494	0.286082	0.0386907	0.302614	0.0388651	0.284595	0.0388523	0.282037	0.0389446	0.283262	0.0387276
Plot Type	1	0.284831	0.0377282	0.159197	0.0235416	0.182256	0.026722			0.301354	0.0380604	0.311412	0.0382354	0.297248	0.0383575	0.285663	0.0383395	0.311039	0.038531	0.292173	0.038516	0.304691	0.0386212	0.304506	0.0385081	0.300461	0.0384646	0.305214	0.038566	0.292081	0.0385536	0.296859	0.0385814	0.303208	0.0385726	0.303263	0.0387711	0.285202	0.0387091	0.301798	0.0388864	0.283681	0.038873	0.281264	0.0389677	0.282537	0.0387438
1st free col	49	0.273277	0.0378073	0.165117	0.0243632	0.193957	0.028316			0.300093	0.0380565	0.309911	0.0382311	0.296004	0.0383525	0.284423	0.0383353	0.309639	0.038526	0.290834	0.0385113	0.303446	0.0386159	0.303054	0.0385038	0.299325	0.0384609	0.303753	0.0385615	0.290756	0.0385493	0.295744	0.038577	0.301738	0.0385683	0.302001	0.0387653	0.283775	0.0387043	0.300474	0.0388808	0.282197	0.0388676	0.280011	0.0389616	0.281361	0.0387396
Sigma Level	1	0.297067	0.0378988	0.171067	0.0251854	0.205774	0.0299124			0.298397	0.0380342	0.30789	0.038206	0.29433	0.0383235	0.282754	0.0383108	0.307756	0.0384968	0.289034	0.0384842	0.301772	0.0385854	0.301101	0.038479	0.297797	0.0384392	0.301787	0.0385353	0.288972	0.0385246	0.294244	0.0385519	0.299761	0.0385437	0.300304	0.0387324	0.281855	0.0386766	0.298694	0.0388485	0.280202	0.0388364	0.278325	0.0389264	0.279779	0.0387151
Absolute Errs	TRUE	0.278812	0.0379286	0.177048	0.0260083	0.217708	0.0315113			0.29633	0.0379943	0.305429	0.0381612	0.292291	0.0382716	0.28072	0.0382669	0.305463	0.0384447	0.286841	0.0384358	0.299732	0.0385308	0.298722	0.0384346	0.295935	0.0384003	0.299392	0.0384885	0.2868	0.0384803	0.292416	0.0385069	0.297352	0.0384995	0.298236	0.0386735	0.279516	0.038627	0.296526	0.0387907	0.277771	0.0387805	0.276273	0.0388634	0.277852	0.0386713
Symbol Type	1	0.292271	0.0379593	0.183059	0.0268319	0.229759	0.0331127			0.293972	0.0379382	0.302621	0.0380983	0.289965	0.0381988	0.278401	0.0382054	0.302846	0.0383716	0.284339	0.0383679	0.297406	0.0384542	0.296007	0.0383723	0.293812	0.0383459	0.296659	0.0384228	0.284322	0.0384182	0.290332	0.0384439	0.294605	0.0384375	0.295879	0.038591	0.276847	0.0385574	0.294053	0.0387096	0.274998	0.0387022	0.273932	0.0387752	0.275655	0.0386099
Inverse Plot	FALSE	0.290008	0.0379692	0.189101	0.0276561	0.24193	0.0347165			0.291414	0.0378682	0.299574	0.0380197	0.287442	0.0381079	0.275885	0.0381286	0.300008	0.0382804	0.281625	0.0382831	0.294882	0.0383587	0.293063	0.0382945	0.291508	0.0382778	0.293695	0.0383407	0.281634	0.0383406	0.288071	0.0383652	0.291623	0.0383601	0.293321	0.0384879	0.273953	0.0384705	0.29137	0.0386085	0.27199	0.0386044	0.271393	0.0386651	0.27327	0.0385333
Color Plot	TRUE	0.289119	0.0379933	0.195174	0.028481	0.254222	0.0363229			0.288754	0.037787	0.296406	0.0379286	0.284819	0.0380025	0.273269	0.0380394	0.297056	0.0381744	0.278803	0.0381847	0.292258	0.0382478	0.290001	0.0382043	0.289112	0.0381988	0.290613	0.0382455	0.278838	0.0382506	0.28572	0.0382738	0.288523	0.0382702	0.290661	0.0383684	0.270943	0.0383697	0.288581	0.038491	0.268862	0.0384909	0.268752	0.0385374	0.270791	0.0384443
3D plot	FALSE	0.290621	0.0379975	0.201278	0.0293066	0.266635	0.0379317			0.286095	0.0376977	0.293239	0.0378283	0.282196	0.0378865	0.270653	0.0379413	0.294105	0.0380579	0.275981	0.0380765	0.289635	0.0381257	0.286939	0.0381049	0.286717	0.038112	0.287531	0.0381407	0.276043	0.0381516	0.283369	0.0381733	0.285423	0.0381714	0.288002	0.0382368	0.267933	0.0382588	0.285792	0.0383619	0.265734	0.0383661	0.266113	0.0383969	0.268312	0.0383464
Linear	FALSE	0.278846	0.0380163	0.207413	0.0301328	0.279171	0.0395431			0.283538	0.0376036	0.290193	0.0377227	0.279675	0.0377644	0.268137	0.0378381	0.291268	0.0379353	0.273268	0.0379625	0.287112	0.0379973	0.283995	0.0380004	0.284414	0.0380205	0.284568	0.0380304	0.273355	0.0380474	0.281109	0.0380675	0.282443	0.0380674	0.285446	0.0380984	0.265039	0.038142	0.28311	0.038226	0.262727	0.0382347	0.263576	0.038249	0.265929	0.0382433
Data Range	G5:J23	0.285729	0.0380361	0.213579	0.0309597	0.291832	0.0411569			0.281181	0.0375085	0.287386	0.0376159	0.277351	0.0376409	0.26582	0.0377337	0.288653	0.0378112	0.270768	0.0378473	0.284788	0.0378675	0.281282	0.0378947	0.282292	0.037928	0.281837	0.0379189	0.270879	0.037942	0.279026	0.0379606	0.279696	0.0379621	0.283091	0.0379584	0.262373	0.038024	0.28064	0.0380885	0.259957	0.0381018	0.261238	0.0380994	0.263733	0.0381391
Filled Symbols	TRUE	0.28853	0.0380363	0.219777	0.0317872	0.304617	0.0427732			0.279116	0.037416	0.284927	0.037512	0.275315	0.0375208	0.263789	0.0376321	0.286362	0.0376906	0.268577	0.0377352	0.282752	0.0377411	0.278904	0.0377918	0.280432	0.0378381	0.279444	0.0378104	0.268708	0.0378395	0.277201	0.0378565	0.277289	0.0378598	0.281027	0.0378222	0.260036	0.0379091	0.278475	0.0379547	0.257528	0.0379725	0.259189	0.0379539	0.261808	0.0380378
ConcAge	FALSE	0.290676	0.0380575	0.226006	0.0326154	0.317529	0.0443921			0.277422	0.0373296	0.282908	0.037415	0.273645	0.0374087	0.262122	0.0375372	0.284482	0.0375779	0.26678	0.0376305	0.281081	0.0376232	0.276954	0.0376958	0.278906	0.0377541	0.277481	0.037709	0.266928	0.0377437	0.275704	0.0377593	0.275314	0.0377642	0.279334	0.0376951	0.258119	0.0378018	0.276699	0.0378299	0.255536	0.0378518	0.257509	0.0378181	0.260229	0.0379431
ConcSwap	FALSE	0.270952	0.0381072	0.232268	0.0334443	0.330569	0.0460135			0.276163	0.0372526	0.281409	0.0373286	0.272404	0.0373088	0.260884	0.0374528	0.283086	0.0374776	0.265445	0.0375373	0.279841	0.0375182	0.275504	0.0376102	0.277773	0.0376792	0.276022	0.0376188	0.265605	0.0376584	0.274592	0.0376728	0.273847	0.037679	0.278077	0.0375819	0.256695	0.0377063	0.27538	0.0377187	0.254057	0.0377443	0.256262	0.0376972	0.259056	0.0378588
1st Symbol-row	1	0.288594	0.0381857	0.238561	0.0342738	0.343738	0.0476374			0.275388	0.0371881	0.280487	0.0372562	0.271641	0.0372251	0.260123	0.0373819	0.282227	0.0373934	0.264623	0.0374591	0.279078	0.0374301	0.274613	0.0375385	0.277075	0.0376165	0.275124	0.0375431	0.264791	0.0375869	0.273908	0.0376003	0.272944	0.0376076	0.277304	0.0374869	0.255819	0.0376262	0.274569	0.0376254	0.253146	0.0376542	0.255495	0.0375958	0.258335	0.0377881
		0.268873	0.0381956	0.244886	0.035104	IsoLine	IsoLine			0.275128	0.0371384	0.280176	0.0372004	0.271385	0.0371606	0.259867	0.0373274	0.281939	0.0373287	0.264347	0.037399	0.278822	0.0373624	0.274312	0.0374833	0.276841	0.0375682	0.274822	0.0374849	0.264517	0.0375319	0.273679	0.0375445	0.27264	0.0375527	0.277045	0.0374139	0.255524	0.0375645	0.274297	0.0375537	0.252841	0.0375848	0.255238	0.0375178	0.258092	0.0377337
		0.268769	0.0382054	0.251244	0.0359349					0.275391	0.0371056	0.280489	0.0371635	0.271646	0.037118	0.260126	0.0372914	0.282231	0.0372859	0.264627	0.0373592	0.279083	0.0373176	0.274615	0.0374468	0.277078	0.0375363	0.275128	0.0374464	0.264794	0.0374955	0.273912	0.0375075	0.272947	0.0375163	0.27731	0.0373656	0.255822	0.0375238	0.274575	0.0375063	0.253151	0.0375389	0.255502	0.0374663	0.258338	0.0376977
		0.2708	0.0382127	0.257634	0.0367664					0.276168	0.0370908	0.281415	0.0371469	0.272413	0.0370989	0.260891	0.0372752	0.283094	0.0372666	0.265452	0.0373413	0.279851	0.0372974	0.27551	0.0374303	0.277778	0.0375219	0.276028	0.037429	0.265611	0.0374791	0.2746	0.0374909	0.273853	0.0375	0.278088	0.0373439	0.256702	0.0375054	0.275391	0.037485	0.254065	0.0375183	0.256275	0.0374431	0.259063	0.0376816
		IsoLine	IsoLine	0.264057	0.0375986					0.277429	0.0370946	0.282916	0.0371512	0.273658	0.0371039	0.262131	0.0372794	0.284494	0.0372716	0.26679	0.037346	0.281096	0.0373027	0.276962	0.0374346	0.278914	0.0375256	0.27749	0.0374335	0.266936	0.0374834	0.275715	0.0374953	0.275322	0.0375042	0.27935	0.0373497	0.258129	0.0375102	0.276714	0.0374906	0.255549	0.0375237	0.257528	0.0374493	0.260239	0.0376858
				0.270513	0.0384315					0.279126	0.037117	0.284937	0.0371763	0.275331	0.0371329	0.2638	0.0373039	0.286377	0.0373008	0.26859	0.037373	0.28277	0.0373333	0.278915	0.0374594	0.280442	0.0375474	0.279455	0.0374597	0.26872	0.0375081	0.277215	0.0375204	0.2773	0.0375289	0.281048	0.0373826	0.260049	0.0375379	0.278494	0.0375229	0.257544	0.0375549	0.259213	0.0374845	0.26182	0.0377103
				0.277001	0.0392651					0.281193	0.0371569	0.287398	0.0372211	0.27737	0.0371848	0.265833	0.0373478	0.288671	0.0373529	0.270784	0.0374214	0.28481	0.0373878	0.281294	0.0375038	0.282304	0.0375862	0.281851	0.0375066	0.270892	0.0375524	0.279042	0.0375654	0.279708	0.0375731	0.283115	0.0374415	0.262388	0.0375875	0.280662	0.0375807	0.259975	0.0376107	0.261266	0.0375474	0.263747	0.037754
				0.283523	0.0400993					0.28355	0.0372129	0.290206	0.037284	0.279696	0.0372576	0.268153	0.0374093	0.291287	0.037426	0.273285	0.0374893	0.287136	0.0374644	0.284008	0.0375661	0.284427	0.0376407	0.284583	0.0375723	0.27337	0.0376145	0.281127	0.0376284	0.282456	0.0376351	0.285473	0.037524	0.265057	0.0376571	0.283135	0.0376618	0.262748	0.0376891	0.263607	0.0376356	0.265945	0.0378155
				0.290078	0.0409342					0.286108	0.0372829	0.293253	0.0373626	0.282219	0.0373485	0.270669	0.0374861	0.294125	0.0375172	0.275999	0.0375741	0.28966	0.03756	0.286953	0.0376439	0.286731	0.0377087	0.287547	0.0376543	0.276058	0.037692	0.283388	0.0377071	0.285437	0.0377125	0.288031	0.0376271	0.267951	0.037744	0.285818	0.0377629	0.265756	0.0377868	0.266146	0.0377457	0.268329	0.0378921
				0.296666	0.0417697					0.288768	0.0373641	0.296421	0.0374538	0.284842	0.0374539	0.273285	0.0375753	0.297077	0.0376232	0.278822	0.0376725	0.292284	0.0376709	0.290015	0.0377341	0.289127	0.0377877	0.290629	0.0377496	0.278854	0.037782	0.285739	0.0377985	0.288537	0.0378023	0.29069	0.0377466	0.270961	0.0378448	0.288608	0.0378804	0.268884	0.0379003	0.268786	0.0378735	0.270808	0.0379811
				0.303289	0.0426059					0.291428	0.0374535	0.299588	0.037554	0.287465	0.0375699	0.275901	0.0376734	0.300028	0.0377397	0.281643	0.0377808	0.294907	0.0377929	0.293077	0.0378335	0.291522	0.0378746	0.293711	0.0378543	0.281649	0.0378811	0.28809	0.037899	0.291637	0.0379012	0.293349	0.0378782	0.273971	0.0379557	0.291397	0.0380095	0.272012	0.0380252	0.271426	0.038014	0.273287	0.038079
				0.309944	0.0434428					0.293985	0.0375475	0.302634	0.0376596	0.289987	0.037692	0.278417	0.0377766	0.302865	0.0378623	0.284357	0.0378947	0.297429	0.0379213	0.296021	0.037938	0.293825	0.037966	0.296674	0.0379646	0.284337	0.0379853	0.29035	0.0380047	0.294618	0.0380052	0.295906	0.0380166	0.276864	0.0380725	0.294078	0.0381454	0.275019	0.0381566	0.273963	0.0381619	0.275671	0.038182
				0.316634	0.0442804					0.296341	0.0376426	0.305441	0.0377664	0.29231	0.0378155	0.280734	0.037881	0.30548	0.0379863	0.286857	0.03801	0.299753	0.0380512	0.298734	0.0380437	0.295947	0.0380585	0.299405	0.0380762	0.286813	0.0380907	0.292432	0.0381117	0.297364	0.0381104	0.298261	0.0381566	0.279531	0.0381905	0.296548	0.0382829	0.27779	0.0382895	0.276301	0.0383114	0.277867	0.0382863
				0.323359	0.0451186					0.298406	0.0377352	0.3079	0.0378703	0.294346	0.0379356	0.282765	0.0379826	0.307771	0.038107	0.289047	0.0381221	0.30179	0.0381775	0.301111	0.0381466	0.297807	0.0381485	0.301798	0.0381847	0.288984	0.0381932	0.294257	0.0382158	0.299771	0.0382128	0.300325	0.0382928	0.281868	0.0383054	0.298713	0.0384167	0.280218	0.0384187	0.278349	0.0384569	0.279792	0.0383876
				0.330117	0.0459575					0.300101	0.0378216	0.309919	0.0379673	0.296017	0.0380477	0.284432	0.0380774	0.309651	0.0382197	0.290845	0.0382267	0.30346	0.0382954	0.303062	0.0382426	0.299333	0.0382325	0.303762	0.038286	0.290764	0.038289	0.295754	0.0383129	0.301746	0.0383084	0.302018	0.0384199	0.283785	0.0384127	0.300489	0.0385415	0.28221	0.0385395	0.280029	0.0385927	0.281371	0.0384823
				0.33691	0.0467971					0.301359	0.0378985	0.311418	0.0380537	0.297257	0.0381476	0.28567	0.0381619	0.311047	0.03832	0.29218	0.03832	0.304701	0.0384005	0.304511	0.0383282	0.300466	0.0383073	0.30522	0.0383762	0.292087	0.0383742	0.296866	0.0383995	0.303213	0.0383935	0.303275	0.0385332	0.285209	0.0385082	0.301808	0.0386527	0.28369	0.038647	0.281277	0.0387136	0.282543	0.0385666
				0.343738	0.0476374					0.302134	0.0379631	0.31234	0.0381261	0.29802	0.0382313	0.286431	0.0382328	0.311906	0.0384042	0.293001	0.0383981	0.305464	0.0384886	0.305403	0.0383999	0.301164	0.0383701	0.306118	0.0384519	0.292901	0.0384458	0.29755	0.038472	0.304116	0.0384649	0.304048	0.0386281	0.286085	0.0385883	0.302619	0.038746	0.2846	0.0387371	0.282044	0.038815	0.283265	0.0386373
				0.346697	0.048					0.302394	0.0380127	0.312651	0.0381819	0.298276	0.0382957	0.286687	0.0382872	0.312195	0.0384689	0.293278	0.0384583	0.30572	0.0385563	0.305703	0.0384551	0.301398	0.0384183	0.30642	0.0385101	0.293175	0.0385008	0.29778	0.0385278	0.30442	0.0385199	0.304307	0.0387011	0.28638	0.03865	0.302891	0.0388177	0.284906	0.0388065	0.2823	0.038893	0.283507	0.0386917
				IsoLine	IsoLine					ErrEll	ErrEll	ErrEll	ErrEll	ErrEll	ErrEll	ErrEll	ErrEll	ErrEll	ErrEll	ErrEll	ErrEll	ErrEll	ErrEll	ErrEll	ErrEll	ErrEll	ErrEll	ErrEll	ErrEll	ErrEll	ErrEll	ErrEll	ErrEll	ErrEll	ErrEll	ErrEll	ErrEll	ErrEll	ErrEll	ErrEll	ErrEll	ErrEll	ErrEll	ErrEll	ErrEll	ErrEll	ErrEll

## Sheet: An-2
Table S1. LA-ICP-MS zircon U-Pb data for the metamorphic rocks in this study.
Spot No.	Elemental data			Isotopic Ratios						Age (Ma)
	Th	U	Th/U	207Pb/206Pb	1σ	207Pb/235U	1σ	206Pb/238U	1σ	207Pb/206Pb	1σ	207Pb/235U	1σ	206Pb/238U	1σ	Concordance
	(ppm)	(ppm)
11	637.201	801.182	0.795327	0.0553513	0.00173984	0.288761	0.00899897	0.0375756	0.000320525	427.825	70.3625	257.584	7.09223	237.788	1.99554	0.92
41	676.168	796.836	0.848566	0.0567369	0.00212261	0.296414	0.010718	0.0376912	0.000359827	479.67	81.4725	263.595	8.39648	238.506	2.23905	0.9
39	963.656	1278.62	0.753672	0.0543568	0.00170833	0.284831	0.00887502	0.0377282	0.000416074	387.09	65.735	254.482	7.01593	238.736	2.58789	0.93
17	728.73	1278.31	0.570072	0.0521847	0.00171889	0.273277	0.00885177	0.0378073	0.000351859	294.505	75.915	245.31	7.06087	239.227	2.18941	0.97
31	765.355	1083.32	0.706491	0.0565592	0.00193383	0.297067	0.00998556	0.0378988	0.000417988	475.97	75.9175	264.106	7.81906	239.795	2.59936	0.9
35	331.65	707.555	0.468727	0.0529376	0.00191455	0.278812	0.00954811	0.0379286	0.000388336	327.835	81.4725	249.715	7.58314	239.981	2.41538	0.96
20	810.346	1141.75	0.709738	0.055601	0.00168525	0.292271	0.0088772	0.0379593	0.000437627	435.23	66.66	260.345	6.97738	240.171	2.72105	0.91
27	844.131	804.519	1.04924	0.054949	0.00193441	0.290008	0.0103601	0.0379692	0.000356295	409.31	79.6225	258.566	8.15645	240.233	2.21661	0.92
14	1255.12	1466.15	0.856066	0.054825	0.0015749	0.289119	0.00810491	0.0379933	0.000311657	405.605	69.4375	257.866	6.38629	240.382	1.93988	0.92
4	434.425	747.183	0.581417	0.0551409	0.00203511	0.290621	0.0104282	0.0379975	0.000375874	416.715	83.325	259.048	8.20616	240.409	2.33795	0.92
37	434.64	754.443	0.576107	0.0527706	0.00179874	0.278846	0.00945806	0.0380163	0.000355198	320.43	77.77	249.742	7.51147	240.526	2.20971	0.96
2	1284.89	1337.46	0.96069	0.0543781	0.00153102	0.285729	0.00795434	0.0380361	0.000360473	387.09	64.8075	255.192	6.2842	240.649	2.24238	0.94
40	546.692	885.578	0.617328	0.0547656	0.00207147	0.28853	0.0104885	0.0380363	0.000354594	466.71	83.325	257.402	8.26693	240.649	2.20593	0.93
30	1049.05	1139.8	0.920383	0.0553041	0.0018101	0.290676	0.00899729	0.0380575	0.000471779	433.38	72.215	259.091	7.08042	240.781	2.93267	0.92
18	339.736	631.692	0.537819	0.0515064	0.00198454	0.270952	0.0101835	0.0381072	0.000397914	264.88	88.875	243.455	8.13743	241.09	2.47439	0.99
29	681.746	1161.83	0.586784	0.0545482	0.00183769	0.288594	0.009437	0.0381857	0.000463285	394.495	80.5475	257.452	7.4382	241.577	2.87964	0.93
5	460.145	665.508	0.691419	0.0506243	0.00195575	0.268873	0.0105826	0.0381956	0.000447833	233.4	88.875	241.792	8.47008	241.639	2.78377	0.99
12	531.911	870.359	0.61114	0.0508322	0.00166385	0.268769	0.00893145	0.0382054	0.000503992	231.55	69.4325	241.709	7.14964	241.7	3.1321	0.99
24	780.541	899.28	0.867962	0.0510828	0.0016391	0.2708	0.00838797	0.0382127	0.000351171	255.62	74.0625	243.333	6.70412	241.745	2.18438	0.99
7	503.396	759.413	0.662875	0.0565667	0.00217743	0.265874	0.00969483	0.0340473	0.000335973	475.97	89.805	239.39	7.77813	215.829	2.09775	0.89
36	442.423	783.56	0.564632	0.0571887	0.00178858	0.288492	0.00851186	0.0364062	0.000338135	498.19	68.5125	257.372	6.70997	230.518	2.10687	0.88
38	800.392	1278.66	0.625963	0.0570835	0.00173085	0.275144	0.00805977	0.0346955	0.000297313	494.485	66.66	246.798	6.4201	219.869	1.85613	0.88
3	1058.42	1538.09	0.688142	0.057729	0.00165829	0.27587	0.00745519	0.0345733	0.000255725	520.41	67.5825	247.376	5.93549	219.108	1.59781	0.87
22	1054.92	1337.05	0.788985	0.0585865	0.00180343	0.309776	0.00929483	0.0382011	0.000443955	550.035	66.655	274.007	7.20808	241.673	2.7597	0.87
33	346.883	513.367	0.675702	0.0597475	0.00202617	0.317846	0.0101124	0.0384249	0.000391728	594.47	72.21	280.244	7.79379	243.062	2.43534	0.85
34	312.147	652.029	0.478731	0.0595503	0.00213495	0.301391	0.0104989	0.0365206	0.000369968	587.065	77.765	267.486	8.19355	231.23	2.30432	0.85
6	1746.92	1523.21	1.14687	0.0590144	0.00201627	0.263796	0.00841618	0.0322171	0.000301114	568.55	69.4325	237.721	6.76382	204.409	1.88376	0.84
8	775.217	977.485	0.793073	0.0591094	0.00199147	0.264992	0.00871587	0.0323595	0.000277648	572.255	74.0625	238.681	6.99793	205.299	1.73727	0.84
21	612.083	940.256	0.650975	0.0607926	0.00200555	0.314492	0.00996067	0.0374128	0.000354101	631.5	67.58	277.657	7.69646	236.776	2.20407	0.84
15	529.184	1072.93	0.493215	0.0623205	0.00226777	0.326214	0.0108971	0.0381415	0.000448125	684.89	77.77	286.671	8.34534	241.303	2.78571	0.82
26	621.665	1070.82	0.580551	0.0614824	0.001794	0.331161	0.00928864	0.0387174	0.000321803	657.42	62.9525	290.452	7.08794	244.878	2.00152	0.82
19	478.797	731.787	0.654284	0.0626753	0.00199592	0.324439	0.0100693	0.0374282	0.000325658	698.16	68.5125	285.312	7.72205	236.872	2.02763	0.81

## Sheet: PlotDat5
Source sheet	An-2 (2)	0.2	240.175	1	237.788	1.99554	0.85	235.792
Plot name	Average5	19.8	240.175	2	238.506	2.23905	1.15	235.792
Plot Type	15			3	238.736	2.58789	1.15	239.783
1st free col	8			4	239.227	2.18941	0.85	239.783
Sigma Level	1			5	239.795	2.59936	0.85	235.792
Absolute Errs	TRUE			6	239.981	2.41538	ErrBox	ErrBox
Symbol Type	1			7	240.171	2.72105	1.85	236.267
Inverse Plot	FALSE			8	240.233	2.21661	2.15	236.267
Color Plot	TRUE			9	240.382	1.93988	2.15	240.745
3D plot	FALSE			10	240.409	2.33795	1.85	240.745
Linear	FALSE			11	240.526	2.20971	1.85	236.267
Data Range	O13:P31			12	240.649	2.24238	ErrBox	ErrBox
Filled Symbols	TRUE			13	240.649	2.20593	2.85	236.148
ConcAge	FALSE			14	240.781	2.93267	3.15	236.148
ConcSwap	FALSE			15	241.09	2.47439	3.15	241.324
1st Symbol-row	1			16	241.577	2.87964	2.85	241.324
				17	241.639	2.78377	2.85	236.148
				18	241.7	3.1321	ErrBox	ErrBox
				19	241.745	2.18438	3.85	237.038
				IsoLine	IsoLine	IsoLine	4.15	237.038
							4.15	241.417
							3.85	241.417
							3.85	237.038
							ErrBox	ErrBox
							4.85	237.196
							5.15	237.196
							5.15	242.395
							4.85	242.395
							4.85	237.196
							ErrBox	ErrBox
							5.85	237.565
							6.15	237.565
							6.15	242.396
							5.85	242.396
							5.85	237.565
							ErrBox	ErrBox
							6.85	237.45
							7.15	237.45
							7.15	242.893
							6.85	242.893
							6.85	237.45
							ErrBox	ErrBox
							7.85	238.016
							8.15	238.016
							8.15	242.449
							7.85	242.449
							7.85	238.016
							ErrBox	ErrBox
							8.85	238.442
							9.15	238.442
							9.15	242.322
							8.85	242.322
							8.85	238.442
							ErrBox	ErrBox
							9.85	238.071
							10.15	238.071
							10.15	242.747
							9.85	242.747
							9.85	238.071
							ErrBox	ErrBox
							10.85	238.316
							11.15	238.316
							11.15	242.735
							10.85	242.735
							10.85	238.316
							ErrBox	ErrBox
							11.85	238.406
							12.15	238.406
							12.15	242.891
							11.85	242.891
							11.85	238.406
							ErrBox	ErrBox
							12.85	238.443
							13.15	238.443
							13.15	242.855
							12.85	242.855
							12.85	238.443
							ErrBox	ErrBox
							13.85	237.849
							14.15	237.849
							14.15	243.714
							13.85	243.714
							13.85	237.849
							ErrBox	ErrBox
							14.85	238.616
							15.15	238.616
							15.15	243.564
							14.85	243.564
							14.85	238.616
							ErrBox	ErrBox
							15.85	238.698
							16.15	238.698
							16.15	244.457
							15.85	244.457
							15.85	238.698
							ErrBox	ErrBox
							16.85	238.855
							17.15	238.855
							17.15	244.423
							16.85	244.423
							16.85	238.855
							ErrBox	ErrBox
							17.85	238.568
							18.15	238.568
							18.15	244.832
							17.85	244.832
							17.85	238.568
							ErrBox	ErrBox
							18.85	239.561
							19.15	239.561
							19.15	243.929
							18.85	243.929
							18.85	239.561
							ErrBox	ErrBox

## Sheet: PlotDat2
Source sheet	An-3 (2)	0.2	233.539	1	229.171	2.63578	0.85	226.536
Plot name	Average1	14.8	233.539	2	230.033	2.09737	1.15	226.536
Plot Type	15			3	231.298	1.99121	1.15	231.807
1st free col	8			4	233.143	2.46634	0.85	231.807
Sigma Level	1			5	233.315	2.37077	0.85	226.536
Absolute Errs	TRUE			6	233.697	2.31972	ErrBox	ErrBox
Symbol Type	1			7	233.714	2.1437	1.85	227.936
Inverse Plot	FALSE			8	233.867	2.47363	2.15	227.936
Color Plot	TRUE			9	234.225	2.28928	2.15	232.131
3D plot	FALSE			10	234.25	2.33227	1.85	232.131
Linear	FALSE			11	234.334	2.15273	1.85	227.936
Data Range	O5:P18			12	236.109	2.58138	ErrBox	ErrBox
Filled Symbols	TRUE			13	236.585	2.39063	2.85	229.307
ConcAge	FALSE			14	236.905	2.32559	3.15	229.307
ConcSwap	FALSE			IsoLine	IsoLine	IsoLine	3.15	233.289
1st Symbol-row	1						2.85	233.289
							2.85	229.307
							ErrBox	ErrBox
							3.85	230.677
							4.15	230.677
							4.15	235.609
							3.85	235.609
							3.85	230.677
							ErrBox	ErrBox
							4.85	230.944
							5.15	230.944
							5.15	235.685
							4.85	235.685
							4.85	230.944
							ErrBox	ErrBox
							5.85	231.377
							6.15	231.377
							6.15	236.017
							5.85	236.017
							5.85	231.377
							ErrBox	ErrBox
							6.85	231.57
							7.15	231.57
							7.15	235.858
							6.85	235.858
							6.85	231.57
							ErrBox	ErrBox
							7.85	231.393
							8.15	231.393
							8.15	236.341
							7.85	236.341
							7.85	231.393
							ErrBox	ErrBox
							8.85	231.936
							9.15	231.936
							9.15	236.514
							8.85	236.514
							8.85	231.936
							ErrBox	ErrBox
							9.85	231.917
							10.15	231.917
							10.15	236.582
							9.85	236.582
							9.85	231.917
							ErrBox	ErrBox
							10.85	232.181
							11.15	232.181
							11.15	236.487
							10.85	236.487
							10.85	232.181
							ErrBox	ErrBox
							11.85	233.528
							12.15	233.528
							12.15	238.69
							11.85	238.69
							11.85	233.528
							ErrBox	ErrBox
							12.85	234.195
							13.15	234.195
							13.15	238.976
							12.85	238.976
							12.85	234.195
							ErrBox	ErrBox
							13.85	234.58
							14.15	234.58
							14.15	239.231
							13.85	239.231
							13.85	234.58
							ErrBox	ErrBox

## Sheet: PlotDat3
Source sheet	An-3 (2)	0.252799	0.0361897	0.148159	0.022	0.159197	0.0235416	0.14	0.0474282	0.265878	0.036767	0.291459	0.0367873	0.271509	0.0369674	0.272696	0.0373686	0.275897	0.0373752	0.277221	0.0374255	0.283972	0.0373896	0.277453	0.0374867	0.274114	0.0375039	0.27736	0.0375172	0.272375	0.0374913	0.286809	0.0378713	0.28306	0.0379061	0.274847	0.0379433
Plot name	Concordia2	0.276969	0.0363282	0.153307	0.0227206	0.17067	0.0251306	0.36	0.0287258	0.265625	0.0368103	0.291179	0.0368217	0.27125	0.0370001	0.272403	0.0374092	0.275653	0.0374142	0.276933	0.0374637	0.283721	0.0374248	0.277115	0.0375274	0.273855	0.0375415	0.277078	0.0375556	0.272136	0.0375267	0.286515	0.0379138	0.282828	0.0379454	0.27461	0.0379816
Plot Type	1	0.258121	0.0365316	0.159197	0.0235416	0.182256	0.026722			0.264878	0.0368298	0.290353	0.0368373	0.270487	0.0370149	0.271541	0.0374274	0.274935	0.0374318	0.276082	0.0374809	0.282978	0.0374407	0.276115	0.0375457	0.273093	0.0375585	0.276244	0.0375729	0.27143	0.0375427	0.28565	0.0379329	0.282145	0.0379631	0.273911	0.0379988
1st free col	39	0.257581	0.0368282	0.165117	0.0243632	0.193957	0.028316			0.263667	0.0368246	0.289013	0.0368333	0.269249	0.0370111	0.270143	0.0374227	0.273771	0.0374272	0.274702	0.0374764	0.281773	0.0374366	0.274492	0.037541	0.271857	0.0375541	0.274891	0.0375684	0.270286	0.0375385	0.284246	0.0379279	0.281037	0.0379584	0.272778	0.0379942
Sigma Level	1	0.263317	0.0368558	0.171067	0.0251854	0.205774	0.0299124			0.262039	0.0367951	0.28721	0.0368098	0.267583	0.0369888	0.268262	0.0373951	0.272205	0.0374006	0.272846	0.0374505	0.280151	0.0374126	0.272309	0.0375133	0.270194	0.0375284	0.273071	0.0375423	0.268746	0.0375144	0.282357	0.037899	0.279547	0.0379316	0.271255	0.0379682
Absolute Errs	TRUE	0.262305	0.0369174	0.177048	0.0260083	0.217708	0.0315113			0.260055	0.0367423	0.285013	0.0367679	0.265553	0.036949	0.26597	0.0373457	0.270297	0.0373531	0.270585	0.037404	0.278176	0.0373697	0.26965	0.0374638	0.268168	0.0374826	0.270854	0.0374956	0.266871	0.0374713	0.280056	0.0378473	0.277732	0.0378837	0.269399	0.0379216
Symbol Type	1	0.270946	0.0369201	0.183059	0.0268319	0.229759	0.0331127			0.257793	0.0366683	0.282508	0.036709	0.263238	0.0368931	0.263356	0.0372764	0.268121	0.0372865	0.268005	0.0373389	0.275924	0.0373095	0.266616	0.0373943	0.265857	0.0374183	0.268325	0.0374301	0.264732	0.0374109	0.277432	0.0377747	0.275662	0.0378165	0.267282	0.0378562
Inverse Plot	FALSE	0.25991	0.0369447	0.189101	0.0276561	0.24193	0.0347165			0.255338	0.0365759	0.279789	0.0366355	0.260727	0.0368233	0.26052	0.0371899	0.265761	0.0372034	0.265206	0.0372576	0.273479	0.0372343	0.263325	0.0373076	0.26335	0.037338	0.265581	0.0373483	0.262411	0.0373354	0.274584	0.0376841	0.273417	0.0377326	0.264985	0.0377746
Color Plot	TRUE	0.260752	0.0370023	0.195174	0.028481	0.254222	0.0363229			0.252787	0.0364686	0.276962	0.0365503	0.258115	0.0367424	0.257571	0.0370895	0.263306	0.0371069	0.262296	0.0371631	0.270938	0.0371471	0.259902	0.0372069	0.260743	0.0372448	0.262728	0.0372534	0.259998	0.0372478	0.271624	0.037579	0.271082	0.0376353	0.262597	0.0376799
3D plot	FALSE	0.262737	0.0370063	0.201278	0.0293066	0.266635	0.0379317			0.250235	0.0363506	0.274136	0.0364564	0.255503	0.0366533	0.254623	0.0369791	0.260852	0.0370007	0.259386	0.0370593	0.268397	0.0370512	0.25648	0.0370961	0.258136	0.0371423	0.259875	0.0371489	0.257585	0.0371514	0.268663	0.0374634	0.268747	0.0375282	0.26021	0.0375757
Linear	FALSE	0.260007	0.0370198	0.207413	0.0301328	0.279171	0.0395431			0.247782	0.0362264	0.271418	0.0363577	0.252992	0.0365596	0.251788	0.0368629	0.258493	0.036889	0.256588	0.03695	0.265954	0.0369502	0.253189	0.0369795	0.25563	0.0370344	0.257133	0.037039	0.255265	0.03705	0.265817	0.0373416	0.266503	0.0374154	0.257914	0.0374661
Data Range	G5:J18	0.271634	0.0373054	0.213579	0.0309597	0.291832	0.0411569			0.245522	0.0361009	0.268914	0.0362578	0.250678	0.0364647	0.249175	0.0367453	0.256319	0.036776	0.25401	0.0368394	0.263702	0.036848	0.250157	0.0368616	0.253321	0.0369253	0.254605	0.0369279	0.253128	0.0369474	0.263194	0.0372185	0.264435	0.0373014	0.255799	0.0373552
Filled Symbols	TRUE	0.271093	0.0373821	0.219777	0.0317872	0.304617	0.0427732			0.243542	0.0359787	0.266719	0.0361606	0.24865	0.0363725	0.246886	0.0366309	0.254414	0.0366661	0.251751	0.0367319	0.261729	0.0367486	0.2475	0.0367469	0.251297	0.0368192	0.25239	0.0368197	0.251255	0.0368476	0.260896	0.0370988	0.262623	0.0371905	0.253946	0.0372473
ConcAge	FALSE	0.262607	0.0374336	0.226006	0.0326154	0.317529	0.0443921			0.241917	0.0358646	0.264918	0.0360699	0.246986	0.0362863	0.245008	0.0365241	0.252851	0.0365634	0.249897	0.0366314	0.260111	0.0366559	0.245319	0.0366398	0.249637	0.03672	0.250573	0.0367187	0.249718	0.0367544	0.25901	0.0369869	0.261137	0.037087	0.252425	0.0371466
ConcSwap	FALSE	IsoLine	IsoLine	0.232268	0.0334443	0.330569	0.0460135			0.24071	0.0357631	0.26358	0.0359891	0.245751	0.0362096	0.243613	0.036429	0.25169	0.0364721	0.24852	0.036542	0.258908	0.0365732	0.2437	0.0365444	0.248403	0.0366318	0.249223	0.0366288	0.248576	0.0366714	0.25761	0.0368873	0.260033	0.0369948	0.251296	0.0370569
1st Symbol-row	1			0.238561	0.0342738	0.343738	0.0476374			0.239968	0.0356779	0.262757	0.0359213	0.24499	0.0361453	0.242754	0.0363493	0.250976	0.0363954	0.247673	0.036467	0.258169	0.0365039	0.242703	0.0364643	0.247645	0.0365578	0.248392	0.0365533	0.247874	0.0366018	0.256748	0.0368038	0.259354	0.0369175	0.250601	0.0369817
				0.244886	0.035104	IsoLine	IsoLine			0.239719	0.0356124	0.26248	0.0358692	0.244734	0.0360958	0.242466	0.0362879	0.250737	0.0363365	0.247388	0.0364092	0.25792	0.0364506	0.242367	0.0364028	0.24739	0.0365008	0.248113	0.0364953	0.247638	0.0365483	0.256459	0.0367396	0.259126	0.036858	0.250368	0.0369238
				0.251244	0.0359349					0.239973	0.035569	0.26276	0.0358347	0.244993	0.036063	0.242758	0.0362473	0.25098	0.0362975	0.247676	0.0363711	0.258172	0.0364153	0.242706	0.036362	0.247648	0.0364631	0.248396	0.0364569	0.247877	0.0365129	0.256752	0.0366971	0.259358	0.0368187	0.250605	0.0368856
				0.257634	0.0367664					0.24072	0.0355496	0.263586	0.0358192	0.245756	0.0360483	0.24362	0.0362291	0.251698	0.0362799	0.248527	0.0363539	0.258915	0.0363995	0.243706	0.0363437	0.24841	0.0364462	0.24923	0.0364397	0.248583	0.0364969	0.257618	0.0366779	0.260041	0.036801	0.251304	0.0368683
				0.264057	0.0375986					0.241931	0.0355547	0.264926	0.0358232	0.246994	0.0360521	0.245018	0.0362338	0.252863	0.0362845	0.249907	0.0363584	0.26012	0.0364036	0.245328	0.0363485	0.249647	0.0364506	0.250582	0.0364442	0.249727	0.0365011	0.259022	0.0366829	0.261149	0.0368057	0.252436	0.0368729
				0.270513	0.0384315					0.243559	0.0355842	0.266729	0.0358466	0.24866	0.0360744	0.246899	0.0362614	0.254429	0.0363111	0.251763	0.0363843	0.261741	0.0364276	0.247511	0.0363761	0.25131	0.0364762	0.252402	0.0364703	0.251267	0.0365252	0.260911	0.0367118	0.262639	0.0368325	0.25396	0.0368989
				0.277001	0.0392651					0.245543	0.035637	0.268925	0.0358886	0.25069	0.0361142	0.249191	0.0363108	0.256336	0.0363586	0.254024	0.0364307	0.263716	0.0364705	0.250171	0.0364257	0.253336	0.0365221	0.25462	0.036517	0.253142	0.0365683	0.263211	0.0367636	0.264454	0.0368804	0.255816	0.0369455
				0.283523	0.0400993					0.247805	0.0357111	0.271431	0.0359474	0.253005	0.0361701	0.251805	0.0363801	0.258512	0.0364252	0.256604	0.0364959	0.265969	0.0365307	0.253204	0.0364951	0.255647	0.0365864	0.257149	0.0365825	0.255281	0.0366288	0.265836	0.0368361	0.266524	0.0369476	0.257933	0.0370109
				0.290078	0.0409342					0.250259	0.0358035	0.27415	0.0360209	0.255516	0.0362398	0.254641	0.0364666	0.260873	0.0365083	0.259403	0.0365772	0.268413	0.0366058	0.256496	0.0365819	0.258154	0.0366667	0.259892	0.0366642	0.257602	0.0367042	0.268683	0.0369267	0.268769	0.0370315	0.26023	0.0370925
				0.296666	0.0417697					0.252811	0.0359107	0.276976	0.0361062	0.258128	0.0363208	0.25759	0.036567	0.263327	0.0366048	0.262313	0.0366716	0.270954	0.0366931	0.259918	0.0366826	0.260761	0.0367599	0.262745	0.0367592	0.260015	0.0367918	0.271644	0.0370318	0.271104	0.0371289	0.262618	0.0371872
				0.303289	0.0426059					0.255363	0.0360287	0.279803	0.0362	0.26074	0.0364099	0.260539	0.0366774	0.265781	0.036711	0.265223	0.0367755	0.273495	0.036789	0.263341	0.0367933	0.263368	0.0368624	0.265598	0.0368636	0.262428	0.0368882	0.274604	0.0371475	0.273438	0.0372359	0.265005	0.0372914
				0.309944	0.0434428					0.257816	0.0361529	0.282521	0.0362987	0.263251	0.0365036	0.263373	0.0367936	0.268141	0.0368227	0.268021	0.0368848	0.275939	0.03689	0.266631	0.0369099	0.265874	0.0369702	0.268341	0.0369735	0.264748	0.0369896	0.27745	0.0372692	0.275683	0.0373487	0.267301	0.037401
				0.316634	0.0442804					0.260076	0.0362785	0.285025	0.0363986	0.265565	0.0365984	0.265986	0.0369112	0.270315	0.0369357	0.270599	0.0369954	0.27819	0.0369922	0.269663	0.0370278	0.268183	0.0370794	0.270868	0.0370847	0.266885	0.0370922	0.280073	0.0373923	0.27775	0.0374627	0.269416	0.0375119
				0.323359	0.0451186					0.262056	0.0364007	0.28722	0.0364958	0.267593	0.0366907	0.268275	0.0370256	0.27222	0.0370456	0.272858	0.0371029	0.280163	0.0370915	0.272321	0.0371426	0.270207	0.0371855	0.273083	0.0371928	0.268759	0.037192	0.282371	0.0375121	0.279563	0.0375736	0.271269	0.0376198
				0.330117	0.0459575					0.263681	0.0365147	0.289021	0.0365865	0.269257	0.0367768	0.270153	0.0371324	0.273783	0.0371482	0.274712	0.0372034	0.281782	0.0371843	0.274501	0.0372497	0.271867	0.0372846	0.274901	0.0372938	0.270296	0.0372852	0.284257	0.0376239	0.281049	0.0376771	0.27279	0.0377205
				0.33691	0.0467971					0.264887	0.0366163	0.290359	0.0366673	0.270492	0.0368535	0.271549	0.0372275	0.274943	0.0372396	0.276089	0.0372928	0.282984	0.037267	0.276121	0.0373451	0.2731	0.0373729	0.27625	0.0373838	0.271437	0.0373682	0.285658	0.0377235	0.282153	0.0377693	0.273919	0.0378102
				0.343738	0.0476374					0.265629	0.0367015	0.291182	0.0367351	0.271253	0.0369179	0.272407	0.0373072	0.275657	0.0373163	0.276936	0.0373678	0.283724	0.0373363	0.277118	0.0374251	0.273859	0.0374469	0.277081	0.0374592	0.272139	0.0374378	0.286519	0.037807	0.282832	0.0378466	0.274614	0.0378854
				0.346697	0.048					0.265878	0.036767	0.291459	0.0367873	0.271509	0.0369674	0.272696	0.0373686	0.275897	0.0373752	0.277221	0.0374255	0.283972	0.0373896	0.277453	0.0374867	0.274114	0.0375039	0.27736	0.0375172	0.272375	0.0374913	0.286809	0.0378713	0.28306	0.0379061	0.274847	0.0379433
				IsoLine	IsoLine					ErrEll	ErrEll	ErrEll	ErrEll	ErrEll	ErrEll	ErrEll	ErrEll	ErrEll	ErrEll	ErrEll	ErrEll	ErrEll	ErrEll	ErrEll	ErrEll	ErrEll	ErrEll	ErrEll	ErrEll	ErrEll	ErrEll	ErrEll	ErrEll	ErrEll	ErrEll	ErrEll	ErrEll

## Sheet: An-3
Table S1. LA-ICP-MS zircon U-Pb data for the metamorphic rocks in this study.
Spot No.	Elemental data			Isotopic Ratios						Age (Ma)
	Th	U	Th/U	207Pb/206Pb	1σ	207Pb/235U	1σ	206Pb/238U	1σ	207Pb/206Pb	1σ	207Pb/235U	1σ	206Pb/238U	1σ	Concordance
	(ppm)	(ppm)
23	404.122	605.848	0.667035	0.0505826	0.00175276	0.252799	0.0086334	0.0361897	0.000423206	220.44	81.4675	228.847	6.99903	229.171	2.63578	0.99
7	657.449	957.896	0.686347	0.0553155	0.00201143	0.276969	0.00956399	0.0363282	0.000336582	433.38	81.4725	248.251	7.60669	230.033	2.09737	0.92
8	446.867	798.632	0.55954	0.0511078	0.00175811	0.258121	0.00883664	0.0365316	0.00031954	255.62	79.615	233.152	7.13348	231.298	1.99121	0.99
27	360.359	481.583	0.748281	0.0506209	0.00201303	0.257581	0.00997696	0.0368282	0.000396164	233.4	97.2075	232.715	8.05705	233.143	2.46634	0.99
24	394.107	554.303	0.710996	0.0516188	0.00164076	0.263317	0.00830375	0.0368558	0.000380781	333.39	72.21	237.336	6.67604	233.315	2.37077	0.98
2	512.6	855.568	0.599134	0.0512568	0.00195017	0.262305	0.00984595	0.0369174	0.000372578	253.77	91.6525	236.522	7.9216	233.697	2.31972	0.98
20	484.839	898.781	0.539441	0.0531407	0.00175449	0.270946	0.00859828	0.0369201	0.000344222	344.5	75.92	243.45	6.87133	233.714	2.1437	0.95
25	307.674	409.133	0.752015	0.050786	0.00226126	0.25991	0.0115797	0.0369447	0.00039738	231.55	103.69	234.595	9.3336	233.867	2.47363	0.99
49	446.052	710.375	0.627911	0.050871	0.00172829	0.260752	0.00881994	0.0370023	0.000367703	235.25	84.245	235.273	7.1052	234.225	2.28928	0.99
28	320.645	457.494	0.700874	0.0512871	0.00184957	0.262737	0.00965258	0.0370063	0.00037463	253.77	87.95	236.87	7.76344	234.25	2.33227	0.98
48	526.786	822.505	0.640465	0.0505682	0.00155863	0.260007	0.00816415	0.0370198	0.000345706	220.44	74.9875	234.672	6.58106	234.334	2.15273	0.99
3	437.572	652.51	0.670599	0.0525324	0.00195023	0.271634	0.0100166	0.0373054	0.000414869	309.32	85.175	243.999	7.99988	236.109	2.58138	0.96
4	446.36	833.506	0.535521	0.0525821	0.00164442	0.271093	0.00789896	0.0373821	0.00038416	309.32	74.9925	243.567	6.31208	236.585	2.39063	0.97
42	495.025	883.315	0.560418	0.0506583	0.00154805	0.262607	0.00807892	0.0374336	0.000373694	233.4	70.3575	236.766	6.49903	236.905	2.32559	0.99
17	701.768	903.071	0.777091	0.0627815	0.00180775	0.302822	0.00851016	0.0348167	0.000313392	701.86	61.105	268.602	6.6351	220.624	1.95591	0.8
18	378.978	430.485	0.880352	0.0564599	0.00256804	0.276889	0.0119389	0.0357629	0.000484159	477.82	101.84	248.187	9.49533	226.516	3.0158	0.86
16	646.643	1108.88	0.583151	0.0560123	0.00159061	0.275771	0.00800357	0.0354431	0.000364124	453.75	67.585	247.297	6.37225	224.525	2.27019	0.87
39	538.046	739.787	0.727298	0.0565503	0.00226951	0.272034	0.0102995	0.0349003	0.000337465	472.265	88.88	244.318	8.22311	221.145	2.10547	0.88
11	777.094	903.247	0.860334	0.0560385	0.00193401	0.273725	0.0100103	0.0351545	0.000348753	453.75	75.9175	245.667	7.98169	222.728	2.17518	0.89
41	620.928	807.146	0.769288	0.0563452	0.00194135	0.266026	0.00886017	0.0342387	0.000307686	464.86	75.9175	239.511	7.10793	217.022	1.92138	0.89
